# Supplementary material for: Life cycle assessment in wastewater treatment: influence of site-oriented normalization factors, life cycle impact assessment methods, and weighting methods
Source: Royal Society of Chemistry journal article supplement (doi:10.1039/c7ra01016h), 2017-01-01
Supplement: c7ra01016h1.pdf [file c7ra01016h1.pdf]

1

## Supporting Information

2 **Life cycle assessment in wastewater treatment: Influence of site-oriented normalization**  
3 **factors, life cycle impact assessment methods, and weighting methods**

4 Shunwen Bai<sup>1</sup>, Xiuheng Wang<sup>1</sup>, Xuedong Zhang<sup>2</sup>, Xinyue Zhao<sup>1</sup>, Nanqi Ren<sup>1\*</sup>

5 <sup>1</sup> State Key Laboratory of Urban Water Resource and Environment, School of Municipal and  
6 Environmental Engineering, Harbin Institute of Technology, Harbin 150090, People's Republic of  
7 China.

8 <sup>2</sup> Section Sanitary Engineering Department of Water Management, Delft University of Technology,  
9 Stevinweg 1, 2628CN, Delft, the Netherlands.

10 Corresponding author E-mail: [rnq@hit.edu.cn](mailto:rnq@hit.edu.cn) (Nanqi Ren)

11 Telephone/fax number: +86-04516282099

12 First author's email address: [baishunwen@163.com](mailto:baishunwen@163.com)

13

14 **Table S1- Inputs and outputs of different scenarios**

|                                                          | Parameter                                         | Unit            | Scenario-1 | Scenario-2 | Scenario-3 | Scenario-4 |
|----------------------------------------------------------|---------------------------------------------------|-----------------|------------|------------|------------|------------|
| Inputs from the background system of different scenarios | Electricity                                       | kWh             | 4380       | 3420       | 3120       | 480        |
|                                                          | Inorganic Chemicals                               | t               | 0.858      | 0.658      | 0.508      | —          |
|                                                          | Chemical transport                                | t.km            | 1716       | 1316       | 1016       | —          |
|                                                          | PAM- acrylonitrile                                | kg              | 7.35       | 7.35       | 6.5        | —          |
| Outputs to the environment of different scenarios        | Tertiary and phosphorus precipitation solid waste | t, water 60 %   | 0.923      | 0.113      | —          | —          |
|                                                          | Bio-sludge                                        | (t, water 80 %) | 8.45       | 7.35       | 6.5        | —          |
|                                                          | CO <sub>2</sub>                                   | (t)             | 1.76       | 1.76       | 1.41       | —          |
|                                                          | N <sub>2</sub> O                                  | (kg)            | 1.02       | 0.68       | 0.18       | 0.22       |
|                                                          | COD                                               | (kg)            | 298        | 426        | 800        | 2592       |
|                                                          | TN                                                | (kg)            | 128        | 142        | 226        | 287        |
|                                                          | TP                                                | (kg)            | 5          | 7.8        | 22         | 34         |
| SST                                                      | (kg)                                              | 82              | 163        | 240        | 1874       |            |

15

16

17 **Table S2- Normalization factors**

| Impact category | Unit                   | Ch <sub>NF</sub> | EU <sub>25+3</sub> | NF <sub>World</sub> | Ch <sub>NF</sub> (of World) |
|-----------------|------------------------|------------------|--------------------|---------------------|-----------------------------|
| ADE             | kg antimony eq.        | 1.44E+07         | 7.24E+07           | 2.09E+08            | 6.86%                       |
| ADF             | MJ                     | 1.44E+13         | 7.24E+13           | 3.80E+14            | 3.79%                       |
| GW              | kg CO <sub>2</sub> eq. | 6.35E+12         | 6.57E+12           | 4.18E+13            | 15.21%                      |
| OD              | kg CFC-11 eq.          | 6.62E+06         | 6.79E+06           | 2.26E+08            | 2.93%                       |
| HT              | kg 1,4-DCB eq.         | 2.27E+12         | 2.27E+12           | 3.63E+13            | 6.25%                       |
| FAET            | kg 1,4-DCB eq.         | 6.03E+09         | 6.03E+09           | 3.47E+12            | 0.17%                       |
| PO              | kg ethylene eq.        | 2.80E+10         | 2.80E+10           | 4.01E+11            | 6.98%                       |
| A               | kg SO <sub>2</sub> eq. | 3.16E+10         | 2.23E+10           | 2.39E+11            | 13.23%                      |
| E               | kg PO <sub>4</sub> eq. | 1.68E+09         | 5.89E+09           | 1.58E+11            | 1.06%                       |

18

19

20

21

22

23

24

25

26

27

28

29

30

31

32

33

34

35

36

37

38 **Table S3- Characterization results and Normalization results**

| Characterization Results from CML                |            |            |            |            |
|--------------------------------------------------|------------|------------|------------|------------|
| Impact categories                                | Scenario 1 | Scenario 2 | Scenario 3 | Scenario 4 |
| ADE (kg antimony eq.)                            | 0.0151     | 0.0109     | 0.00705    | 0.00039    |
| ADF (MJ)                                         | 117000     | 86300      | 76600      | 8860       |
| GW (kg CO <sub>2</sub> eq.)                      | 15700      | 12200      | 10500      | 787        |
| OD (kg CFC-11 eq.)                               | 0.00089    | 0.00067    | 0.00039    | 0.00001    |
| HT (kg 1,4-DCB eq.)                              | 2860       | 2080       | 1740       | 441        |
| FAET (kg 1,4-DCB eq.)                            | 2140       | 1530       | 1300       | 739        |
| PO (kg ethylene eq.)                             | 4.21       | 3.11       | 2.77       | 0.271      |
| A (kg SO <sub>2</sub> eq.)                       | 84.1       | 60.5       | 54.3       | 7.14       |
| E (kg PO <sub>4</sub> eq.)                       | 97.2       | 104        | 189        | 282        |
| □ Normalization Results from NF <sub>World</sub> |            |            |            |            |
| Impact categories                                | Scenario 1 | Scenario 2 | Scenario 3 | Scenario 4 |
| ADE                                              | 7.21E-11   | 5.23E-11   | 3.37E-11   | 1.86E-12   |
| ADF                                              | 3.08E-10   | 2.27E-10   | 2.02E-10   | 2.33E-11   |
| GW                                               | 3.76E-10   | 2.91E-10   | 2.51E-10   | 1.88E-11   |
| OD                                               | 3.94E-12   | 2.93E-12   | 1.73E-12   | 2E-14      |
| HT                                               | 7.88E-11   | 5.75E-11   | 4.79E-11   | 1.22E-11   |
| FAET                                             | 6.16E-10   | 4.42E-10   | 3.76E-10   | 2.13E-10   |
| PO                                               | 1.05E-10   | 7.77E-11   | 6.91E-11   | 6.77E-12   |
| A                                                | 3.52E-10   | 2.53E-10   | 2.27E-10   | 2.99E-11   |
| E                                                | 6.14E-10   | 6.58E-10   | 1.2E-09    | 1.78E-09   |
| □ Normalization Results from Ch <sub>NF</sub>    |            |            |            |            |
| Impact categories                                | Scenario 1 | Scenario 2 | Scenario 3 | Scenario 4 |
| ADE                                              | 1.60E-10   | 1.21E-10   | 7.81E-11   | 4.32E-12   |
| ADF                                              | 8.13E-09   | 5.99E-09   | 5.32E-09   | 6.15E-10   |
| GW                                               | 2.47E-09   | 1.92E-09   | 1.65E-09   | 1.23E-10   |
| OD                                               | 1.31E-10   | 9.86E-11   | 5.74E-11   | 1.47E-12   |
| HT                                               | 1.25E-09   | 9.16E-10   | 7.66E-10   | 1.94E-10   |
| FAET                                             | 3.54E-07   | 2.53E-07   | 2.15E-07   | 1.22E-07   |
| PO                                               | 1.50E-10   | 1.11E-10   | 9.89E-11   | 9.67E-12   |
| A                                                | 2.66E-09   | 1.91E-09   | 1.71E-09   | 2.25E-10   |
| E                                                | 5.78E-08   | 6.18E-08   | 1.12E-07   | 1.67E-07   |

39

40

41 **Table S4- weighting results from methods of EPA, BEES, and EDIP**

| CML               | Normalization results from EPA  |            |            |            | Contribution of each impact category |            |            |            |
|-------------------|---------------------------------|------------|------------|------------|--------------------------------------|------------|------------|------------|
|                   | Scenario 1                      | Scenario 2 | Scenario 3 | Scenario 4 | Scenario 1                           | Scenario 2 | Scenario 3 | Scenario 4 |
| Impact categories |                                 |            |            |            |                                      |            |            |            |
| ADF               | 1.54E+03                        | 1.14E+03   | 1.01E+03   | 1.17E+02   | 7.26%                                | 6.80%      | 5.77%      | 0.96%      |
| GW                | 6.02E+03                        | 4.66E+03   | 4.02E+03   | 3.01E+02   | 28.38%                               | 27.88%     | 22.95%     | 2.49%      |
| OD                | 1.97E+01                        | 1.47E+01   | 8.65E+00   | 1.00E-01   | 0.09%                                | 0.09%      | 0.05%      | 0.00%      |
| HT                | 1.34E+03                        | 9.78E+02   | 8.14E+02   | 2.07E+02   | 6.32%                                | 5.85%      | 4.65%      | 1.71%      |
| FAET              | 6.78E+03                        | 4.86E+03   | 4.14E+03   | 2.34E+03   | 31.96%                               | 29.11%     | 23.63%     | 19.36%     |
| PO                | 6.30E+02                        | 4.66E+02   | 4.15E+02   | 4.06E+01   | 2.97%                                | 2.79%      | 2.37%      | 0.34%      |
| A                 | 1.76E+03                        | 1.27E+03   | 1.14E+03   | 1.50E+02   | 8.30%                                | 7.57%      | 6.49%      | 1.24%      |
| E                 | 3.07E+03                        | 3.29E+03   | 6.00E+03   | 8.90E+03   | 14.48%                               | 19.70%     | 34.29%     | 73.55%     |
| Overall results   | 2.12E+04                        | 1.67E+04   | 1.75E+04   | 1.21E+04   |                                      |            |            |            |
|                   | Normalization results from BEES |            |            |            | Contribution of each impact category |            |            |            |
| Impact categories | Scenario 1                      | Scenario 2 | Scenario 3 | Scenario 4 | Scenario 1                           | Scenario 2 | Scenario 3 | Scenario 4 |
| ADF               | 3.08E+03                        | 2.27E+03   | 2.02E+03   | 2.33E+02   | 12.22%                               | 11.29%     | 9.57%      | 1.75%      |
| GW                | 1.09E+04                        | 8.44E+03   | 7.28E+03   | 5.45E+02   | 43.27%                               | 41.99%     | 34.50%     | 4.10%      |
| OD                | 7.88E+00                        | 5.86E+00   | 3.46E+00   | 4.00E-02   | 0.03%                                | 0.03%      | 0.02%      | 0.00%      |
| HT                | 1.73E+03                        | 1.27E+03   | 1.05E+03   | 2.68E+02   | 6.88%                                | 6.29%      | 4.99%      | 2.02%      |
| FAET              | 4.31E+03                        | 3.09E+03   | 2.63E+03   | 1.49E+03   | 17.11%                               | 15.39%     | 12.47%     | 11.21%     |
| PO                | 4.20E+02                        | 3.11E+02   | 2.76E+02   | 2.71E+01   | 1.67%                                | 1.55%      | 1.31%      | 0.20%      |
| A                 | 1.06E+03                        | 7.59E+02   | 6.81E+02   | 8.97E+01   | 4.19%                                | 3.78%      | 3.23%      | 0.67%      |
| E                 | 3.68E+03                        | 3.95E+03   | 7.20E+03   | 1.07E+04   | 14.62%                               | 19.64%     | 34.12%     | 80.30%     |
| Overall results   | 2.52E+04                        | 2.01E+04   | 2.11E+04   | 1.33E+04   |                                      |            |            |            |
|                   | Normalization results from EDIP |            |            |            | Contribution of each impact category |            |            |            |
| Impact categories | Scenario 1                      | Scenario 2 | Scenario 3 | Scenario 4 | Scenario 1                           | Scenario 2 | Scenario 3 | Scenario 4 |
| GW                | 4.89E+02                        | 3.78E+02   | 3.26E+02   | 2.44E+01   | 25.73%                               | 22.79%     | 14.97%     | 1.11%      |
| OD                | 9.06E+01                        | 6.74E+01   | 3.98E+01   | 4.60E-01   | 4.77%                                | 4.06%      | 1.83%      | 0.02%      |
| PO                | 1.26E+02                        | 9.32E+01   | 8.29E+01   | 8.12E+00   | 6.63%                                | 5.62%      | 3.80%      | 0.37%      |
| A                 | 4.58E+02                        | 3.29E+02   | 2.95E+02   | 3.89E+01   | 24.08%                               | 19.81%     | 13.54%     | 1.76%      |
| E                 | 7.37E+02                        | 7.90E+02   | 1.44E+03   | 2.14E+03   | 38.78%                               | 47.57%     | 66.06%     | 96.65%     |
| Overall results   | 1.90E+03                        | 1.66E+03   | 2.18E+03   | 2.21E+03   |                                      |            |            |            |

42

43

44

45

46

47 **Table S5- weighting results from methods of ECER-115, ECER-125, and ISCP-2009**

| CML               | Normalization results from ECER-115 |            |            |            | Contribution of each impact category |            |            |            |
|-------------------|-------------------------------------|------------|------------|------------|--------------------------------------|------------|------------|------------|
|                   | Scenario 1                          | Scenario 2 | Scenario 3 | Scenario 4 | Scenario 1                           | Scenario 2 | Scenario 3 | Scenario 4 |
| Impact categories |                                     |            |            |            |                                      |            |            |            |
| ADF               | 1.54E+03                            | 1.14E+03   | 1.01E+03   | 1.17E+02   | 28.36%                               | 24.15%     | 18.57%     | 1.41%      |
| GW                | 2.21E+03                            | 1.71E+03   | 1.48E+03   | 1.11E+02   | 40.73%                               | 36.42%     | 27.14%     | 1.34%      |
| A                 | 7.66E+02                            | 5.51E+02   | 4.94E+02   | 6.51E+01   | 14.11%                               | 11.72%     | 9.08%      | 0.79%      |
| COD               | 9.14E+02                            | 1.31E+03   | 2.46E+03   | 7.95E+03   | 16.84%                               | 27.79%     | 45.14%     | 96.42%     |
| Overall results   | 5.43E+03                            | 4.70E+03   | 5.44E+03   | 8.25E+03   |                                      |            |            |            |

  

| CML               | Normalization results from ECER-125 |            |            |            | Contribution of each impact category |            |            |            |
|-------------------|-------------------------------------|------------|------------|------------|--------------------------------------|------------|------------|------------|
|                   | Scenario 1                          | Scenario 2 | Scenario 3 | Scenario 4 | Scenario 1                           | Scenario 2 | Scenario 3 | Scenario 4 |
| Impact categories |                                     |            |            |            |                                      |            |            |            |
| ADF               | 1.93E+03                            | 1.42E+03   | 1.26E+03   | 1.46E+02   | 30.17%                               | 25.29%     | 18.90%     | 1.32%      |
| GW                | 2.21E+03                            | 1.71E+03   | 1.48E+03   | 1.11E+02   | 34.67%                               | 30.51%     | 22.10%     | 1.01%      |
| A                 | 1.02E+03                            | 7.35E+02   | 6.60E+02   | 8.69E+01   | 16.04%                               | 13.11%     | 9.88%      | 0.79%      |
| COD               | 1.22E+03                            | 1.74E+03   | 3.28E+03   | 1.06E+04   | 19.14%                               | 31.09%     | 49.09%     | 96.57%     |
| Overall results   | 6.38E+03                            | 5.61E+03   | 6.68E+03   | 1.10E+04   |                                      |            |            |            |

  

| CML               | Normalization results from ISCP-2009 |            |            |            | Contribution of each impact category |            |            |            |
|-------------------|--------------------------------------|------------|------------|------------|--------------------------------------|------------|------------|------------|
|                   | Scenario 1                           | Scenario 2 | Scenario 3 | Scenario 4 | Scenario 1                           | Scenario 2 | Scenario 3 | Scenario 4 |
| Impact categories |                                      |            |            |            |                                      |            |            |            |
| ADF               | 6.25E+01                             | 4.61E+01   | 4.10E+01   | 4.73E+00   | 23.51%                               | 18.89%     | 12.35%     | 0.95%      |
| GW                | 6.54E+01                             | 5.06E+01   | 4.37E+01   | 3.27E+00   | 24.60%                               | 20.75%     | 13.15%     | 0.66%      |
| A                 | 3.63E+01                             | 2.61E+01   | 2.34E+01   | 3.08E+00   | 13.63%                               | 10.68%     | 7.04%      | 0.62%      |
| E                 | 6.88E+01                             | 7.37E+01   | 1.34E+02   | 1.99E+02   | 25.85%                               | 30.20%     | 40.48%     | 39.95%     |
| COD               | 3.32E+01                             | 4.74E+01   | 8.91E+01   | 2.89E+02   | 12.47%                               | 19.43%     | 26.84%     | 57.85%     |
| Overall results   | 2.66E+02                             | 2.44E+02   | 3.32E+02   | 4.99E+02   |                                      |            |            |            |

48

49
